# Supplementary material for: A rare example of a double metamagnetic transition leading to 2D and 3D long-range order in the two-dimensional pyrazine- and azido-bridged cobalt(ii) compound [Co(pyz)(N3)2]
Source: Royal Society of Chemistry journal article supplement (doi:10.1039/d2dt00294a), 2022-01-01
Supplement: d2dt00294a1.pdf [file d2dt00294a1.pdf]

## Supporting Information Dalton Transactions

### A rare example of double metamagnetic transition leading to 2D and 3D long-range order in the two-dimensional pyrazine- and azido-bridged cobalt(II) compound [Co(py<sub>z</sub>)(N<sub>3</sub>)<sub>2</sub>]

*Zouaoui Setifi, Fatima Setifi, Samia Benmansou, Xiangyu Liu, Joel T.*

*Mague, Carlos J. Gómez-García, Piotr Konieczny, Jan Reedijk*

#### Table of contents:

#### Comments X-ray powder Diffraction

**Figure S1.** Experimental and simulated X-ray powder diffractogram for **1**.

**Figure S2.** Hysteresis cycle of the isothermal magnetization at 2 K for **1**.

**Figure S3.** Thermal variation of the in phase ( $\chi'_{mv}$  left scale) and out-of-phase ( $\chi''_{mv}$  right scale) susceptibilities of **1** at different frequencies with no DC field applied.

**Figure S4.** Thermal variation of the in phase ( $\chi'_{mv}$  left scale) and out-of-phase ( $\chi''_{mv}$  right scale) susceptibilities of **1** at different frequencies with a DC field of 300 mT.

**Figure S5.** Thermal variation of the in phase ( $\chi'_{mv}$  left scale) and out-of-phase ( $\chi''_{mv}$  right scale) susceptibilities of **1** at different frequencies with a DC field of 350 mT.

**Figure S6.** Thermal variation of the in phase ( $\chi'_{mv}$  left scale) and out-of-phase ( $\chi''_{mv}$  right scale) susceptibilities of **1** at 1000 Hz with a DC field of 400 mT.

**Figure S7.** Thermal variation of the in-phase susceptibility ( $\chi''_m$ ) for **1** at 1000 Hz with different DC fields.

## X-ray powder diffraction

The crystalline sample was checked for phase purity with XRPD. This measurement confirm that the sample correspond to the simulated from the single crystal X-ray structure (**Figure S1**).

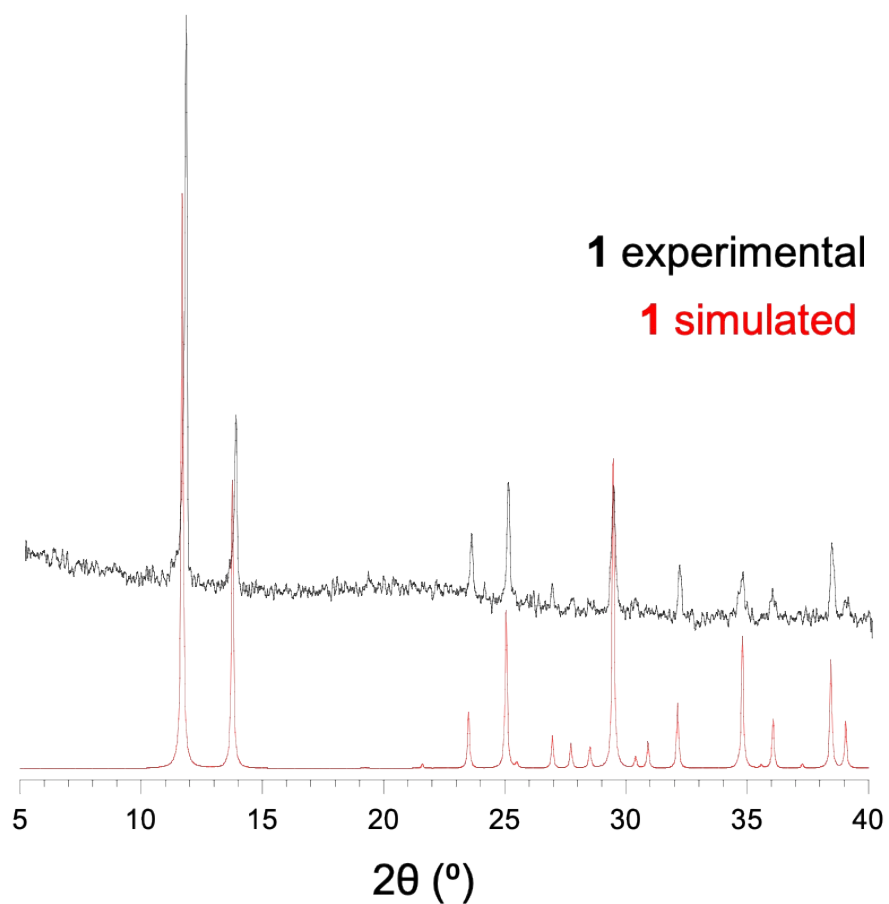

**Figure S1.** Experimental and simulated X-ray powder diffractogram for **1**.

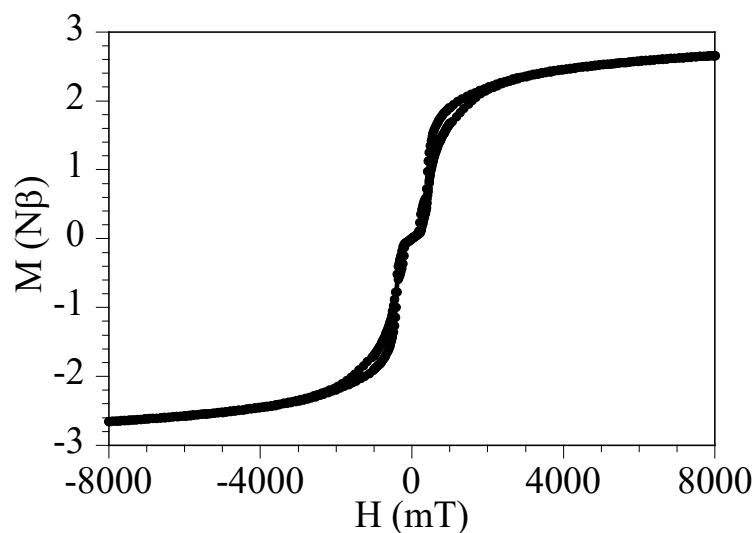

**Figure S2.** Hysteresis cycle of the isothermal magnetization at 2 K for **1**.

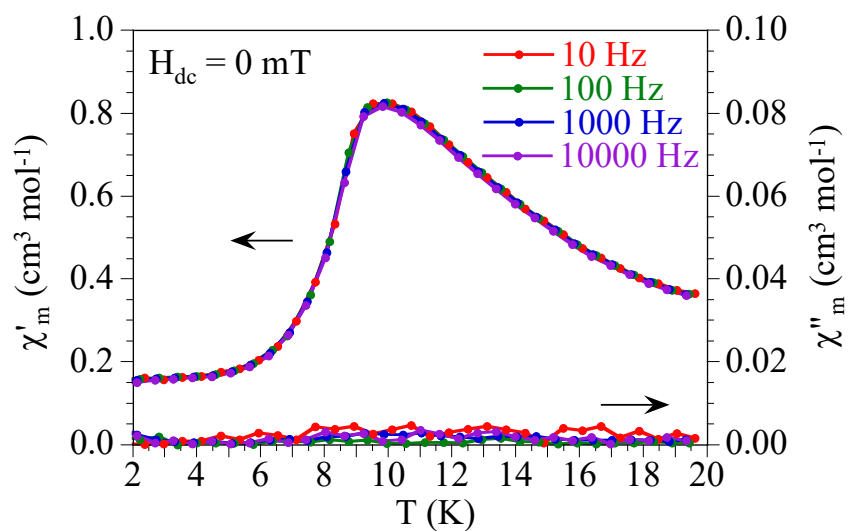

**Figure S3.** Thermal variation of the in phase ( $\chi'_{m'}$ , left scale) and out-of-phase ( $\chi''_{m'}$ , right scale) susceptibilities of **1** at different frequencies with no DC field applied.

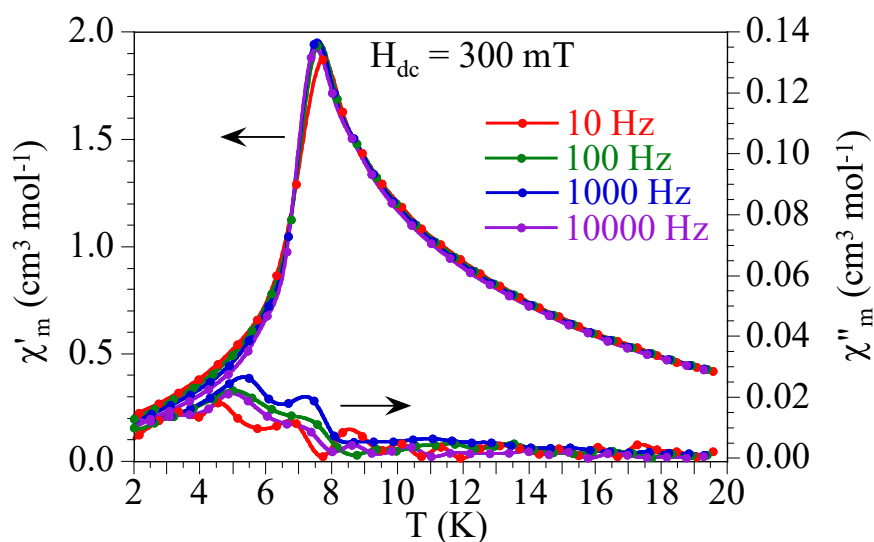

**Figure S4.** Thermal variation of the in phase ( $\chi'_{\text{m}}$  left scale) and out-of-phase ( $\chi''_{\text{m}}$  right scale) susceptibilities of **1** at different frequencies with a DC field of 300 mT.

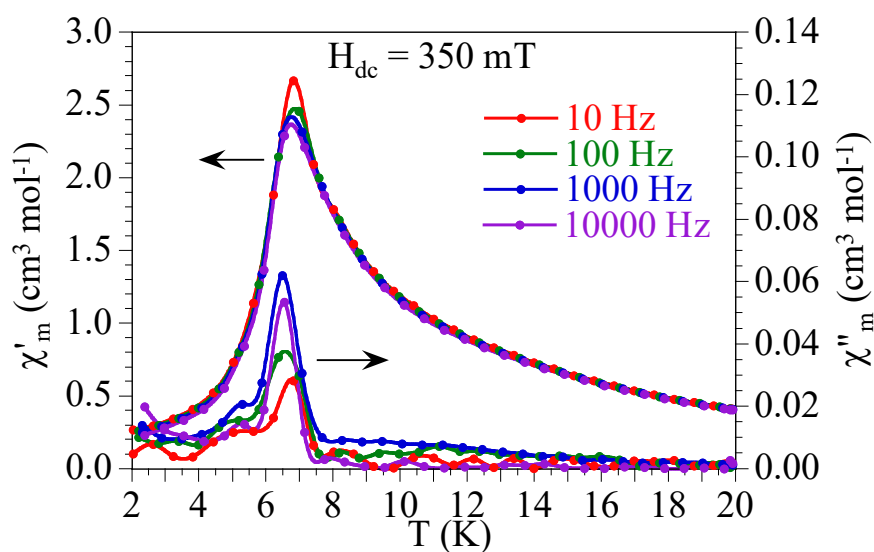

**Figure S5.** Thermal variation of the in phase ( $\chi'_{\text{m}}$  left scale) and out-of-phase ( $\chi''_{\text{m}}$  right scale) susceptibilities of **1** at different frequencies with a DC field of 350 mT.

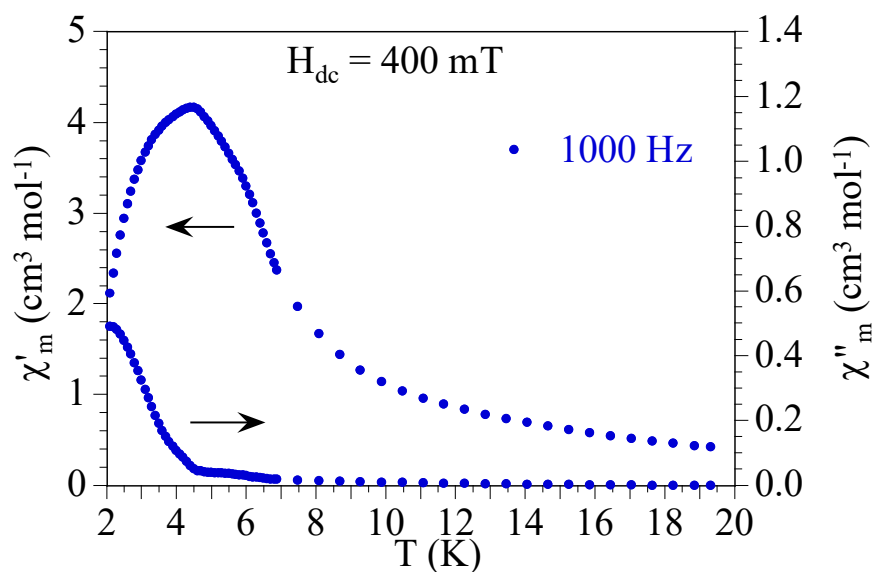

**Figure S6.** Thermal variation of the in phase ( $\chi'_m$ , left scale) and out-of-phase ( $\chi''_m$ , right scale) susceptibilities of **1** at 1000 Hz with a DC field of 400 mT.

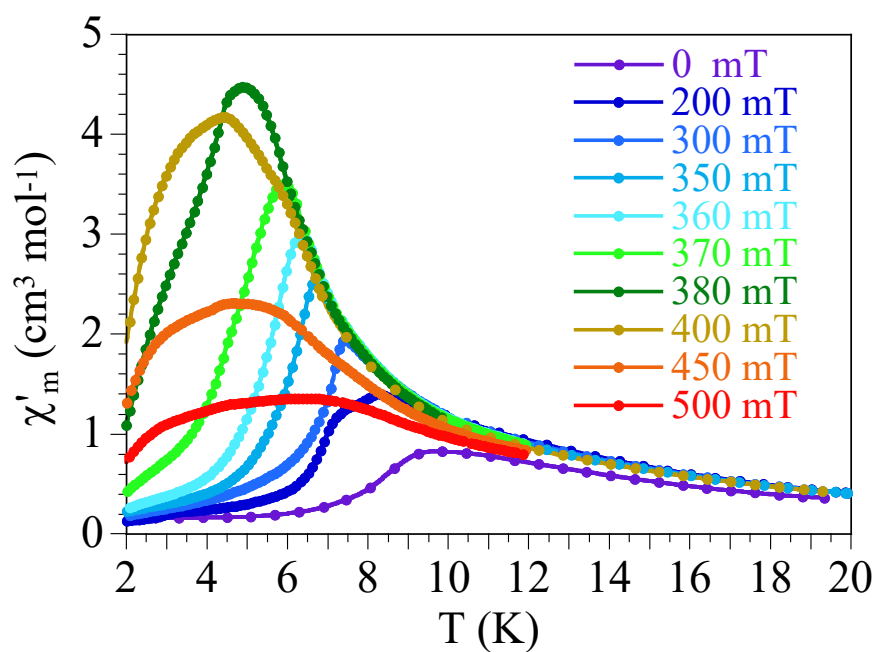

**Figure S7.** Thermal variation of the in-phase susceptibility ( $\chi'_m$ ) for **1** at 1000 Hz with different DC fields.
